# Supplementary material
Source: publisher figshare collection journal article supplement (https://gsapubs.figshare.com/articles/dataset/_/14347001)
Supplement: Supplementary file 1 [file 1]

## Sheet: G48509
George, S.W.M., et al., 2021, Did accretion of the Caribbean oceanic plateau drive rapid crustal thickening in the northern Andes?: Geology, v. 49, https://doi.org/10.1130/G48509.1

## Sheet: Hf analytical settings
	Analytical Settings for Hf Isotope Geochemistry at the Arizona LaserChron Center
	Laboratory and Sample Preparation
	Laboratory name	Arizona LaserChron Center
	Sample type/mineral	Zircon
	Sample preparation	Conventional mineral separation, 1 inch epoxy mount, polished to 1-micron finish
	Imaging	Hitachi 3400N SEM with BSE and/or Cathodoluminesence
	Laser ablation system
	Make, Model, and type	Photon Machines Analyte G2 Excimer laser
	Ablation cell and volume	HelEx ablation cell
	Laser wavelength	193 nm
	Pulse width	~4-6 ns
	Energy density	~6 J/cm2
	Repetition rate	7 Hz
	Alation duration	60 s
	Ablation pit depth/ablation rate	~30 microns & 0.8 microns/sec
	Spot diameter nominal/actual	40 microns
	Sampling mode/pattern	Spot
	Carrier gas	Helium
	Cell carrier gas flow	0.10 L/min He in inner cup, 0.30 L/min He in cell
	ICP-MS instrument
	Make, Model, and type	Nu Plasma multicollector HR ICPMS
	Sample introduction	Ablation aerosol
	RF power	1300 W
	Make-up gas flow	1.05 L/min Ar
	Detection system	12 Faraday collectors with 3e11 ohm resistors, 4 ion counters
	Masses measured	171Yb, 172Yb, 173Yb, 174(Yb+Hf), 175Lu, 176(Yb+Lu+Hf), 177Hf, 178Hf, 179Hf, 180Hf
	Dwell times (ms)	one second for all masses
	Total integration time per output data point (sec)	100 seconds
	Sensitivity as useful yield	~4000 cps/ppm
	IC dead time	N/A, ion counters not used in Hf acquisition
	Data processing
	Gas blank	40 sec on-peak zero subtracted
	Calibration strategy	Seven Hf standards (listed below) are used for Hf and Yb calibrations
	Reference material information	Mud Tank: Woodhead and Hergt, 2005
		Plesovice: Slama et al., 2008
		91500: Woodhead and Hergt 2005; Blichert-Toft, 2007; Fisher et al., 2014; Eddy et al., 2014
		Temora: Woodhead and Hergt, 2005; Fisher et al., 2014
		FC-1: Woodhead and Hergt 2005; Bahlburg et al. 2010; Fisher et al., 2014; Eddy et al., 2017
		R33: Bahlburg et al. 2010; Fisher et al., 2014; Eddy et al., 2017
		SL: Woodhead and Hergt, 2005; Ping et al., 2004, laser; Wu et al., 2006, laser; Santos et al., 2017
	Data processing package used/Correction for LIEF	Hfcalc
	Mass discrimination
	Common Pb correction, composition and uncertainty	N/A
	Uncertainty level and propagation	Uncertainties for individual analyses propagated at 1-sigma
	Quality control/validation	Seven primary standards (described above) mounted and analyzed together with unknowns
	Other information	Seven primary standards (described above) mounted together with unknowns
		Analytical methods described by Gehrels and Pecha (2014)
	Citations:
	Bahlburg, H., Vervoort, J.D., and DuFrane, S.A., 2010, Plate tectonic significance of Middle Cambrian and Ordovician siliciclastic rocks of the Bavarian facies, Armorican terrane assemblage, Germany -- U-Pb and Hf isotope evidence from detrital zircons: Gondwana Research, v. 17 (2-3), p. 223-235.
	Blichert-Toft, J., 2007, The isotopic composition of zircon reference material 91500: Chemical Geology, v. 253, p. 252-257.
	Eddy, M.P., Jagoutz, O., Ibanez-Mejia, M., 2017, Timing of initial seafloor spreading in the Newfoundland-Iberia rift: Geology, v. 45 (6), p. 527-530.
	Gehrels, G.E., Valencia, V., Ruiz, J., 2008, Enhanced precision, accuracy, efficiency, and spatial resolution of U-Pb ages by laser ablation–multicollector–inductively coupled plasma–mass spectrometry: Geochemistry, Geophysics, Geosystems, v. 9, Q03017, doi:10.1029/2007GC001805.
	Gehrels, G. and Pecha, M., 2014, Detrital zircon U-Pb geochronology and Hf isotope geochemistry of Paleozoic and Triassic passive margin strata of western North America: Geosphere, v. 10 (1), p. 49-65.
	Fisher, C.M., and Vervoort, J.V., 2014, Accurate Hf isotope determinations of complex zircons using the "laser ablation split stream" method: Geochemistry, Geophysics, Geosystems, v. 15.
	Ping, X., Fuyuan, W., Liewen, Xi., Yueheng, Y., 2004, Hf isotopic compositions of the standard zircons for U-Pb dating: Chinese Science Bulletin, v., 49, p. 1642-1648.
	Pullen, A., Ibanez-Mejia, M., Gehrels, G., Giesler, D., and Pecha, M., 2018, Optimization of a Laser Ablation-Single Collector-Inductively Coupled Plasma-Mass Spectrometer (Thermo Element 2) for Accurate, Precise, and Efficient Zircon U-Th-Pb Geochronology: Geochemistry, Geophysics, Geosystems, v. 19. https://doi. org/10.1029/2018GC007889
	Santos, M., Lana, C., et al., 2017, A new appraisal of Sri Lankan BB zircon as a reference material for LA-ICP-MS U-Pb geochronology and Lu-Hfg isotope tracing: Geostandards and Geoanalytical Research, v. 41 (3), p. 335-358.
	Sláma, J., Kosler, J., Condon, D.J., Crowley, J.L., Gerdes, A., Hanchar, J.M., Horstwood, M.S.A., Morris, G.A., Nasdala, L., Norberg, N., Schaltegger, U., Schoene, B., Tubrett, M.N., and Whitehouse, M.J., 2008, Plesovice zircon - A new natural reference material for U-Pb and Hf isotopic microanalysis: Chemical Geology, v. 249, p. 1-35.
	Woodhead, J.D., and Hergt, J.M., 2005, A preliminary appraisal of seven natural zircon reference materials for in situ Hf isotope determination: Geostandards and Geoanalytical Research, v. 29 (2), p. 183-195.
	Wu, F.-Y., Yang, Y.H., Xie, L.W., Yang, J.H. and Xu, P., 2006, Hf isotopic compositions of the standard zircons and baddeleyites used in U–Pb geochronology: Chemical Geology, v. 234, p. 105–126.

## Sheet: U-Pb analytical settings
	Analytical Settings for U-Pb Geochronology at the Arizona LaserChron Center (Element 2 Single Collector)
	Laboratory and Sample Preparation
	Laboratory name	Arizona LaserChron Center
	Sample type/mineral	Zircon
	Sample preparation	Conventional mineral separation, 1 inch epoxy mount, polished to 1-micron finish
	Imaging	Hitachi 3400N SEM with BSE and/or Cathodoluminesence
	Laser ablation system
	Make, Model, and type	Photon Machines Analyte G2 Excimer laser
	Ablation cell and volume	HelEx ablation cell
	Laser wavelength	193 nm
	Pulse width	~8 ns
	Energy density	~7 J/cm2
	Repetition rate	8 Hz
	Alation duration	10 s
	Ablation pit depth/ablation rate	~12 microns & 0.8 microns/sec
	Spot diameter nominal/actual	20 microns
	Sampling mode/pattern	Spot
	Carrier gas	Helium
	Cell carrier gas flow	0.11 L/min He in inner cup, 0.29 L/min He in cell
	ICP-MS instrument
	Make, Model, and type	Thermo Element2 HR ICPMS
	Sample introduction	Ablation aerosol
	RF power	1200 W
	Make-up gas flow	0.8 L/min Ar
	Detection system	Dual mode Secondary Electron Multiplier
	Masses measured	202Hg, 204(Hg+Pb), 206Pb, 207Pb, 208Pb, 232Th, 235U, 238U
	Dwell times (ms)	202=5.2, 204=7.8, 206=20.2, 207=28.4, 208=2.6, 232=2.6, 235=15.4, 238=10.4
	Total integration time per output data point (sec)	202=1.5, 204=2.3, 206=5.9, 207=8.3, 208=7.6, 232=7.6, 235=4.5, 238=3.0
	Sensitivity as useful yield	~5000 cps/ppm
	IC dead time	22 ns
	Data processing
	Gas blank	8 sec on-peak zero subtracted
	Calibration strategy	SLM zircon used as primary standard
	Reference material information	Gehrels et al. (2008)
	Data processing package used/Correction for LIEF	E2agecalc
	Mass discrimination	Normalized to primary standard
	Common Pb correction, composition and uncertainty	Common Pb correction based on measured 206Pb/204 Pb and the assumed composition of common Pb based on Stacey and Kramers (1975)
	Uncertainty level and propagation	Uncertainties for individual analyses propagated at 1-sigma. Uncertainty of pooled analyses propagated at 2-sigma.
	Quality control/validation	FC-1 and R33 analyzed as secondary standards.
	Other information	Primary and secondary standards mounted together with unknowns.
		Analytical methods described by Gehrels et al. (2008), Gehrels and Pecha (2014), and Pullen et al. (2018)
	Citations:
	Gehrels, G.E., Valencia, V., Ruiz, J., 2008, Enhanced precision, accuracy, efficiency, and spatial resolution of U-Pb ages by laser ablation–multicollector–inductively coupled plasma–mass spectrometry: Geochemistry, Geophysics, Geosystems, v. 9, Q03017, doi:10.1029/2007GC001805.
	Gehrels, G. and Pecha, M., 2014, Detrital zircon U-Pb geochronology and Hf isotope geochemistry of Paleozoic and Triassic passive margin strata of western North America: Geosphere, v. 10 (1), p. 49-65.
	Pullen, A., Ibanez-Mejia, M., Gehrels, G., Giesler, D., and Pecha, M., 2018, Optimization of a Laser Ablation-Single Collector-Inductively Coupled Plasma-Mass Spectrometer (Thermo Element 2) for Accurate, Precise, and Efficient Zircon U-Th-Pb Geochronology: Geochemistry, Geophysics, Geosystems, v. 19. https://doi. org/10.1029/2018GC007889
	Stacey, J., and Kramers, J., 1975, Approximation of terrestrial lead isotope evolution by a two-stage model: Earth and Planetary Science Letters, v. 26, p. 207 221.

## Sheet: Sample Information
Sample Information
	sample type	Formation/Location	lithology	Latitude (S)	Longitude (W)
CU1738	detrital	Quingeo Fm, Quingeo Basin	sandstone	3.02788	78.9383
EC1301	detrital	Quingeo Fm, Quingeo Basin	sandstone	3.03913	78.9445
EC1308	igneous	Cojitambo, Cuenca Basin	intrusive	2.76191	78.8862
EC1310	igneous	Llacao Volcanics, Cuenca Basin	extrusive	2.82025	78.9246
EC1316	detrital	Letrero Fm, Nabon Basin	sandstone	3.35729	79.0807
EC1502	detrital	forearc	sandstone	0.90818	78.8201
EC1504	detrital	forearc	sandstone	0.95607	78.9969
EC1509	detrital	Modern River Sand; Pastaza River	river sand	1.06168	78.6069
EC1515	igneous	Azafran	granite	1.41044	78.2746
EC1516	detrital	Tena Formation, Subandes	sandstone	1.41419	78.2089
EC1518	igneous	Abitagua	granite	1.44726	78.1601
EC1538	detrital	Mangan Fm, Cuenca Basin	sandstone	2.81671	78.9087
EC1541	detrital	Biblian Fm, Cuenca Basin	sandstone	2.81923	78.8858
EC1552	igneous	San Lucas Pluton, near Loja Basin	granitoid	3.76504	79.2596
EC1555	detrital	Trigal Fm, Loja Basin	sandstone	3.96107	79.2388
EC1557	detrital	San Cayetano Fm, Loja Basin	sandstone	3.97241	79.2299
EC1560	detrital	Quillollaco Fm, Vilcabamba Basin	sandstone	3.98298	79.1715
EC1561	detrital	Trigal Fm, Vilcabamba Basin	sandstone	4.18923	79.3036
EC1562	detrital	Quillollaco Fm, Vilcabamba Basin	sandstone	4.2958	79.2194
EC1568	igneous	Zamora	granitoid	4.02265	78.8947
EC1617	detrital	Quingeo Fm, Quingeo Basin	sandstone	2.9705	78.9087
EC1619	detrital	Quingeo Fm, Quingeo Basin	sandstone	3.00461	78.9459
EC1637	detrital	Yunguilla Fm, near Cuenca Basin	sandstone	3.11173	79.0114
ECGG17	detrital	Tena Formation, Subandes	sandstone	1.0649	77.7912

## Sheet: Raw Lu-Hf data this study
Raw Lu-Hf isotopic data (this study)
Order	Sample	(176Yb + 176Lu) / 176Hf (%)	Volts Hf	176Hf/177Hf	± (1s)	176Lu/177Hf	176Hf/177Hf (T)	E-Hf (0)	E-Hf (0) ± (1s)	E-Hf (T)	Age (Ma)
35	Horton_EC1504_spot47	14.0641	4.39858	0.282732	6.00373e-05	0.00107025	0.282732	-1.86086	2.12307	-1.01661	39.3
36	Horton_EC1504_spot62	26.5414	4.63679	0.282897	2.1979e-05	0.00179717	0.282896	3.97209	0.777233	4.8043	39.6
37	Horton_EC1504_spot34	19.3385	5.00447	0.28276	2.29794e-05	0.00121858	0.282759	-0.871323	0.812612	-0.0137124	40.1
38	Horton_EC1504_spot20	26.6214	3.91629	0.282814	2.80247e-05	0.00153346	0.282813	1.02214	0.991026	1.87794	40.4
39	Horton_EC1504_spot19	19.8087	4.65137	0.282809	2.0701e-05	0.00119335	0.282808	0.859954	0.732042	1.74195	41.2
40	Horton_EC1504_spot45	21.3372	4.63654	0.282907	2.9353e-05	0.00130081	0.282906	4.31489	1.038	5.20708	41.8
41	Horton_EC1504_spot97	13.5581	3.74109	0.282845	2.95818e-05	0.000965952	0.282844	2.11522	1.04609	3.03372	42.6
42	Horton_EC1504_spot35	22.8343	4.72066	0.282658	2.30305e-05	0.00132364	0.282657	-4.49748	0.814418	-3.5513	44.4
43	Horton_EC1504_spot51	14.2905	4.7511	0.283009	2.64409e-05	0.000879146	0.283008	7.91056	0.935019	8.88615	45.1
44	Horton_EC1504_spot10	51.6481	4.68623	0.282947	2.96465e-05	0.00302862	0.282944	5.71196	1.04838	6.64149	46
45	Horton_EC1504_spot67	11.9021	4.29501	0.282936	3.40568e-05	0.000851384	0.282936	5.34853	1.20434	6.35285	46.4
46	Horton_EC1504_spot102	15.1909	4.85689	0.282932	2.5267e-05	0.00102109	0.282931	5.21562	0.893505	6.40648	55.3
47	Horton_EC1504_spot8	28.6295	3.4411	0.282916	3.80688e-05	0.00164592	0.282914	4.64058	1.34621	5.84024	56.8
48	Horton_EC1504_spot15	24.9998	4.42958	0.282786	2.10649e-05	0.001625	0.282784	0.0385846	0.744907	1.24691	57.2
49	Horton_EC1504_spot56	32.6555	3.99622	0.282865	3.04881e-05	0.00205765	0.282863	2.84286	1.07814	4.04144	57.5
50	Horton_EC1504_spot68	11.9927	4.28282	0.282959	2.17751e-05	0.000819852	0.282958	6.14188	0.770024	7.41176	58.6
51	Horton_EC1504_spot61	15.7382	5.34783	0.28266	1.99779e-05	0.000978931	0.282659	-4.41044	0.706471	-2.89368	70.4
52	Horton_EC1504_spot33	8.25721	4.45266	0.282749	2.13557e-05	0.000544269	0.282748	-1.27561	0.755193	0.266222	70.6
53	Horton_EC1504_spot94	14.5077	5.44735	0.282561	2.93614e-05	0.000881117	0.282559	-7.9374	1.03829	-6.40368	71
54	Horton_EC1504_spot81	5.35105	6.33488	0.281335	2.328e-05	0.000306183	0.281335	-51.2761	0.823241	-49.7091	71.6
55	Horton_EC1504_spot93	31.8836	4.32091	0.283059	2.74092e-05	0.00197919	0.283056	9.67919	0.96926	11.1809	71.8
56	Horton_EC1504_spot49	17.5739	4.77522	0.282656	1.81532e-05	0.00108413	0.282655	-4.55509	0.641943	-3.00457	72.2
57	Horton_EC1504_spot48	37.7719	5.58747	0.283086	2.28235e-05	0.00237391	0.283083	10.6607	0.807099	12.1625	72.7
58	Horton_EC1504_spot27	14.8604	4.60279	0.283054	2.67039e-05	0.000945443	0.283053	9.51231	0.944319	11.0847	72.8
59	Horton_EC1504_spot4	19.4464	4.89646	0.282685	1.99493e-05	0.00129096	0.282683	-3.55103	0.705458	-1.99526	72.9
60	Horton_EC1504_spot44	11.515	4.84996	0.2828	2.76085e-05	0.000785845	0.282799	0.521579	0.976306	2.10234	72.9
61	Horton_EC1504_spot89	11.3268	4.68938	0.282877	2.11731e-05	0.000876617	0.282876	3.25962	0.748734	4.82996	72.6
62	Horton_EC1504_spot92	8.43448	4.50444	0.282804	2.43886e-05	0.000542117	0.282804	0.682028	0.862445	2.18929	69
63	Horton_EC1504_spot113	13.8824	4.42743	0.283156	2.67024e-05	0.000979664	0.283154	13.1087	0.944265	14.708	74.1
64	Horton_EC1504_spot69	11.5472	4.48017	0.283087	3.05003e-05	0.000841833	0.283086	10.6899	1.07857	12.2978	74.2
65	Horton_EC1504_spot21	12.2856	5.16993	0.282589	2.44919e-05	0.000722112	0.282588	-6.94621	0.866096	-5.33535	74.2
66	Horton_EC1504_spot60	15.9301	4.8544	0.282687	2.72043e-05	0.00100419	0.282685	-3.46935	0.962015	-1.86743	74.4
67	Horton_EC1504_spot37	21.9061	3.3766	0.282698	3.05843e-05	0.00140832	0.282696	-3.07432	1.08154	-1.49007	74.5
68	Horton_EC1504_spot46	11.7852	5.13509	0.283122	3.16934e-05	0.000971728	0.283121	11.9156	1.12076	13.5346	75
69	Horton_EC1504_spot98	10.3759	4.54314	0.282997	2.14581e-05	0.000842471	0.282996	7.49272	0.758813	9.11741	75
70	Horton_EC1504_spot28	25.1728	4.27084	0.283115	2.6011e-05	0.00188738	0.283113	11.6843	0.919814	13.26	75.1
71	Horton_EC1504_spot105	10.0864	4.99284	0.28257	1.96776e-05	0.000599059	0.282569	-7.59255	0.695849	-5.95394	75.2
72	Horton_EC1504_spot53	21.7942	4.21748	0.283122	2.90347e-05	0.00140753	0.28312	11.9221	1.02674	13.5387	75.9
73	Horton_EC1504_spot3	30.8459	4.42346	0.283071	2.41405e-05	0.00206172	0.283068	10.0989	0.853669	11.6845	76
74	Horton_EC1504_spot23	14.4418	4.90748	0.283067	2.35426e-05	0.00108577	0.283065	9.97446	0.832525	11.7038	80.4
75	Horton_EC1504_spot79	14.5513	4.56934	0.283103	2.19986e-05	0.00102732	0.283101	11.2306	0.777926	12.8856	76.8
76	Horton_EC1504_spot109	30.5421	6.23038	0.283136	2.14082e-05	0.00201901	0.283133	12.4021	0.757048	14.0111	77
77	Horton_EC1504_spot32	28.5657	4.21103	0.28302	2.72481e-05	0.00195115	0.283017	8.29352	0.963563	9.91368	77.4
78	Horton_EC1504_spot63	17.3152	4.14554	0.283188	2.30187e-05	0.00128619	0.283186	14.2502	0.814	15.9139	77.8
79	Horton_EC1504_spot2	26.3852	4.47388	0.283092	2.51415e-05	0.00162804	0.28309	10.8589	0.889069	12.5257	78.8
80	Horton_EC1504_spot36	52.8571	3.77536	0.283189	3.34511e-05	0.00359472	0.283184	14.3	1.18292	15.8788	79.5
81	Horton_EC1516_spot80	16.5531	3.531	0.282977	4.15437e-05	0.00125674	0.282975	6.77674	1.46909	8.40861	76.3
82	Horton_EC1516_spot42	27.3699	3.2534	0.283158	3.96631e-05	0.00178481	0.283156	13.2065	1.40259	14.8655	78.8
83	Horton_EC1516_spot53	22.4532	4.31939	0.282732	3.19902e-05	0.00143994	0.28273	-1.86788	1.13125	-0.140381	81.3
84	Horton_EC1516_spot77	15.4852	3.15062	0.282879	4.01033e-05	0.00100223	0.282877	3.32447	1.41816	5.09369	82.1
85	Horton_EC1516_spot16	20.0718	2.83165	0.283057	4.81395e-05	0.00155619	0.283054	9.60973	1.70234	11.3776	83.4
86	Horton_EC1538_spot79	11.9041	4.18747	0.282927	2.80168e-05	0.000831575	0.282927	5.03282	0.990747	5.27095	11
87	Horton_EC1538_spot107	29.2224	3.93212	0.282951	2.70848e-05	0.00187132	0.28295	5.86477	0.957789	6.09747	11.1
88	Horton_EC1538_spot19	15.8743	5.12311	0.282966	2.48244e-05	0.00108769	0.282966	6.40246	0.877855	6.64521	11.3
89	Horton_EC1538_spot33	11.7265	4.52567	0.282928	2.8846e-05	0.000757952	0.282928	5.05871	1.02007	5.30388	11.3
90	Horton_EC1538_spot93	9.93282	4.48089	0.282985	2.26531e-05	0.000706482	0.282984	7.05986	0.801072	7.29678	10.9
91	Horton_EC1538_spot4	10.4431	4.54652	0.282954	2.29878e-05	0.000693551	0.282954	5.97017	0.812907	6.20715	10.9
92	Horton_EC1538_spot104	13.15	4.17487	0.282962	2.17363e-05	0.00092169	0.282962	6.26562	0.768651	6.51392	11.5
93	Horton_EC1538_spot101	13.0997	4.80605	0.282885	3.00614e-05	0.000929197	0.282885	3.52924	1.06305	3.77742	11.5
94	Horton_EC1538_spot112	19.5685	5.24719	0.282996	2.64113e-05	0.00115009	0.282996	7.4683	0.933969	7.7149	11.5
95	Horton_EC1538_spot73	9.98744	4.40866	0.282942	2.74378e-05	0.000699774	0.282942	5.53965	0.970271	5.78962	11.5
96	Horton_EC1538_spot96	31.6213	5.30405	0.282903	2.55024e-05	0.0020293	0.282902	4.1841	0.901831	4.71391	25.4
97	Horton_EC1538_spot55	42.7559	3.51493	0.282928	3.06421e-05	0.00306183	0.282927	5.06265	1.08358	5.5752	25.4
98	Horton_EC1538_spot45	21.03	5.44553	0.282914	2.00811e-05	0.00138787	0.282914	4.57428	0.710117	5.11063	25.2
99	Horton_EC1538_spot34	28.1113	5.23035	0.282907	1.93154e-05	0.00190656	0.282906	4.30298	0.683041	4.82439	24.9
100	Horton_EC1538_spot82	54.87	4.55341	0.282892	3.60478e-05	0.00339924	0.28289	3.78093	1.27474	4.28774	25.4
101	Horton_EC1538_spot110	20.4472	10.7388	0.283169	4.48753e-05	0.00147072	0.283168	13.5685	1.58691	14.1146	25.7
102	Horton_EC1538_spot42	26.1389	4.79411	0.282942	2.56412e-05	0.00179949	0.282941	5.55639	0.906738	6.10275	26
103	Horton_EC1538_spot26	50.9265	3.90469	0.282936	3.0804e-05	0.0033584	0.282935	5.34829	1.08931	5.86987	26.1
104	Horton_EC1538_spot62	31.8824	5.45699	0.282891	2.68704e-05	0.00203978	0.28289	3.75856	0.950205	4.30903	26.4
105	Horton_EC1538_spot115	50.7396	6.30199	0.282922	2.08316e-05	0.00316377	0.28292	4.82725	0.73666	5.31795	24.4
106	Horton_EC1538_spot60	20.3041	4.56505	0.28288	3.09817e-05	0.00121403	0.282879	3.35538	1.09559	3.98016	29.2
107	Horton_EC1538_spot2	35.4357	5.65869	0.282846	2.34953e-05	0.00205033	0.282845	2.15378	0.830854	2.76652	29.4
108	Horton_EC1538_spot1	10.398	4.17231	0.282803	2.48436e-05	0.000621607	0.282803	0.633184	0.878535	1.27357	29.4
109	Horton_EC1538_spot103	6.89738	4.46847	0.28282	2.65897e-05	0.000409135	0.282819	1.22113	0.940279	1.87445	29.8
110	Horton_EC1538_spot56	38.531	4.3083	0.282826	2.5885e-05	0.00223634	0.282823	1.44077	0.91536	2.68009	59.8
111	Horton_EC1538_spot38	28.7769	4.0246	0.282885	2.36084e-05	0.00185823	0.282884	3.53967	0.834853	4.16882	30
112	Horton_EC1538_spot8	15.1005	4.97128	0.282858	2.52262e-05	0.00094665	0.282858	2.58793	0.892061	3.23723	30.1
113	Horton_EC1538_spot72	10.2053	5.02856	0.282983	2.55036e-05	0.000642311	0.282983	6.99787	0.901874	7.65352	30.1
114	Horton_EC1538_spot9	18.6613	4.6377	0.282912	2.19275e-05	0.00122085	0.282911	4.49495	0.775413	5.14107	30.2
115	Horton_EC1562_spot6	8.56806	4.48806	0.282878	2.45809e-05	0.000625569	0.282878	3.29624	0.869244	3.51404	10
116	Horton_EC1562_spot22	7.15085	5.0898	0.282862	2.12409e-05	0.000521495	0.282861	2.7079	0.751134	2.92638	10
117	Horton_EC1562_spot108	20.3126	4.94467	0.282874	2.18743e-05	0.00138327	0.282874	3.13938	0.773533	3.35218	10
118	Horton_EC1562_spot90	9.93651	4.76712	0.282865	2.47707e-05	0.000694436	0.282865	2.82223	0.875955	3.03957	10
119	Horton_EC1562_spot8	13.2434	5.34785	0.282847	2.12036e-05	0.000916705	0.282847	2.20349	0.749815	2.41934	10
120	Horton_EC1562_spot89	17.2911	4.87562	0.28285	2.70778e-05	0.00118278	0.28285	2.3057	0.957539	2.5198	10
121	Horton_EC1562_spot82	11.9953	4.86985	0.28286	2.29002e-05	0.000807734	0.282859	2.63787	0.809811	2.85445	10
122	Horton_EC1562_spot17	7.84339	5.26531	0.282884	2.60046e-05	0.000544336	0.282884	3.49939	0.91959	3.71992	10.1
123	Horton_EC1562_spot63	22.4832	5.44744	0.282785	2.75269e-05	0.00151082	0.282785	0.0163741	0.973421	0.230377	10.1
124	Horton_EC1562_spot88	9.77052	5.1036	0.282874	3.22825e-05	0.000684305	0.282874	3.16318	1.14159	3.37842	9.9
1	HORTON_EC1561_95	17.2611	4.67987	0.283048	1.97386e-05	0.00125591	0.283047	9.28814	0.698009	9.58102	13.7
2	HORTON_EC1561_89	26.8799	5.19296	0.283049	1.99239e-05	0.00197028	0.283049	9.34351	0.704561	9.64457	14.4
3	HORTON_EC1561_18	14.7722	4.19922	0.282897	1.66466e-05	0.00103244	0.282897	3.96939	0.588665	4.32223	16.4
4	HORTON_EC1561_7	17.8287	4.45004	0.282887	1.52059e-05	0.00114735	0.282887	3.61092	0.537719	3.97966	17.2
5	HORTON_EC1561_78	21.4052	5.03745	0.282978	2.37089e-05	0.00142819	0.282977	6.81753	0.838408	7.19808	17.9
6	HORTON_EC1561_77	16.0674	5.27129	0.283049	1.66504e-05	0.00114965	0.283049	9.34558	0.588801	10.0407	32.4
7	HORTON_EC1561_101	20.3603	5.17926	0.283039	1.80362e-05	0.00136748	0.283038	8.97532	0.637807	9.68277	33.2
8	HORTON_EC1561_20	17.3657	4.55271	0.282973	1.4604e-05	0.00121012	0.282973	6.66194	0.516436	7.37909	33.5
9	HORTON_EC1561_94	56.3252	3.53706	0.2829	2.57682e-05	0.00341455	0.282897	4.05068	0.91123	4.79868	37.5
10	HORTON_EC1561_59	25.2142	4.61143	0.282704	2.31137e-05	0.00164691	0.282702	-2.87663	0.817358	-2.0622	38.6
11	HORTON_EC1555_29	24.5929	4.1841	0.282729	2.30663e-05	0.00152244	0.282727	-1.99509	0.815683	-0.91459	51
12	HORTON_EC1555_43	9.60929	4.56628	0.28285	2.02844e-05	0.00061798	0.282849	2.2838	0.717307	3.68532	64.3
13	HORTON_EC1555_5	31.7753	4.37763	0.282929	1.72853e-05	0.00206042	0.282926	5.09356	0.611251	6.48637	66.8
14	HORTON_EC1555_115	16.8628	5.10907	0.28291	2.04661e-05	0.00120469	0.282908	4.41903	0.723735	5.86022	67.3
15	HORTON_EC1560_100	14.7013	4.00157	0.282847	1.932e-05	0.00110783	0.282845	2.19357	0.683206	4.66008	114.8
16	HORTON_EC1560_83	19.6946	4.85034	0.282897	1.6926e-05	0.00142209	0.282894	3.95412	0.598547	6.40789	115.3
17	HORTON_EC1560_11	11.1344	4.30913	0.282892	2.01575e-05	0.000829964	0.28289	3.78271	0.712821	6.3011	116.2
18	HORTON_EC1560_46	13.6269	4.65474	0.282949	1.74987e-05	0.00101096	0.282947	5.81386	0.618797	8.32967	116.7
19	HORTON_EC1560_68	12.5499	4.13824	0.282974	1.9046e-05	0.000953417	0.282972	6.68013	0.673516	9.25034	119
20	HORTON_EC1560_48	20.2608	4.20543	0.282918	2.17043e-05	0.00142038	0.282915	4.69831	0.767518	7.28242	121.4
21	HORTON_EC1560_104	19.6938	3.61422	0.283052	1.60285e-05	0.00151506	0.283048	9.43364	0.566809	12.0242	122
22	Horton_EC1538_120	34.8317	5.22541	0.282885	2.04715e-05	0.00228021	0.282884	3.54311	0.723924	4.02108	23.1
23	HORTON_EC1538_66	22.0506	4.29665	0.28293	1.53616e-05	0.0014352	0.28293	5.14518	0.543224	5.65313	23.9
24	HORTON_EC1538_43	40.3883	4.27523	0.282814	2.31008e-05	0.00261594	0.282812	1.01253	0.816903	1.67768	32.5
25	HORTON_EC1538_84	26.9385	4.2538	0.282916	1.88828e-05	0.00158715	0.282915	4.62479	0.667745	5.35249	34.4
26	HORTON_EC1541_87	24.9655	4.23237	0.282935	2.18568e-05	0.00236862	0.282934	5.30542	0.772911	5.68305	18.3
27	HORTON_EC1541_115	21.3949	4.21095	0.282924	1.90703e-05	0.001518	0.282924	4.9313	0.674374	5.3404	19.3
28	HORTON_EC1541_68	16.2564	4.18952	0.282894	1.99769e-05	0.00100372	0.282893	3.84555	0.706432	4.28701	20.5
29	HORTON_EC1541_71	17.9718	4.16809	0.28292	1.8036e-05	0.00110317	0.28292	4.77764	0.637799	5.23067	21.1
30	HORTON_EC1541_105	12.7675	4.14666	0.282918	1.83489e-05	0.000921543	0.282918	4.71167	0.648863	5.19314	22.3
31	HORTON_EC1637_55	11.3063	4.12524	0.282934	1.50974e-05	0.000827645	0.282932	5.26218	0.533882	8.3522	142.5
32	HORTON_EC1637_100	21.7025	4.10381	0.283167	1.7218e-05	0.00174197	0.283162	13.4935	0.608873	16.5169	143.3
34	HORTON_EC1619_14	16.3145	4.08238	0.28277	1.91339e-05	0.00112164	0.282769	-0.523435	0.676625	0.819785	62.6
35	HORTON_EC1619_105	14.6001	4.06096	0.282777	1.52356e-05	0.000918234	0.282776	-0.274947	0.538771	1.09185	63.3
36	HORTON_EC1619_112	14.0288	4.03953	0.282758	1.80746e-05	0.000894128	0.282757	-0.953533	0.639166	0.427146	63.9
37	HORTON_EC1619_12	13.9403	4.0181	0.282789	1.57396e-05	0.000969369	0.282788	0.153645	0.556594	1.58093	66.2
38	HORTON_EC1619_80	27.3299	3.99667	0.2827	2.69336e-05	0.00151416	0.282698	-3.01715	0.952442	-1.53569	69.9
39	HORTON_EC1619_35	16.8999	3.97525	0.283052	1.48764e-05	0.00127364	0.28305	9.43513	0.526068	11.3213	88.2
40	HORTON_CU1738_4	11.7609	3.95382	0.282779	1.87916e-05	0.000796565	0.282778	-0.214544	0.66452	1.12048	61.6
41	HORTON_CU1738_16	5.04843	3.93239	0.28259	1.30225e-05	0.000289538	0.28259	-6.89036	0.46051	-5.51801	62.4
42	HORTON_CU1738_24	11.0918	3.91096	0.282755	1.90459e-05	0.000692306	0.282754	-1.07627	0.673512	0.30639	63.6
43	HORTON_EC1557_88	17.2923	3.88954	0.282922	1.82391e-05	0.0012997	0.282921	4.85242	0.64498	5.98392	53
44	HORTON_EC1557_116	7.3482	3.86811	0.282903	1.72404e-05	0.000549404	0.282902	4.15953	0.609666	5.33689	53.9
45	HORTON_EC1557_62	13.2975	3.84668	0.28289	1.89272e-05	0.000884119	0.282889	3.71699	0.669313	4.89536	54.5
46	HORTON_EC1557_80	22.2146	3.82526	0.282849	1.74951e-05	0.00146266	0.282847	2.26352	0.618671	3.55052	60.6
47	HORTON_EC1557_101	22.0059	3.80383	0.282837	1.58973e-05	0.0015696	0.282833	1.84868	0.562169	4.9547	146.6
50	HORTON_EC1301_15	21.8671	3.7824	0.282674	1.62957e-05	0.00137262	0.282672	-3.91882	0.576258	-2.4906	67.1
51	HORTON_EC1301_02	37.7095	3.76097	0.282602	1.21134e-05	0.00231025	0.282599	-6.45625	0.428362	-4.78048	81.1
52	HORTON_EC1301_08	21.3764	3.73955	0.28265	1.59389e-05	0.00173116	0.282648	-4.76265	0.563642	-2.93332	86.9
53	HORTON_EC1301_14	34.4949	3.71812	0.282679	1.71206e-05	0.00216371	0.282675	-3.74087	0.60543	-1.81353	92.8
54	HORTON_EC1301_01	38.0766	3.69669	0.282623	1.53656e-05	0.00230476	0.282618	-5.72701	0.543368	-3.29953	117.4
55	HORTON_EC1301_13	27.1058	3.67527	0.28262	1.69179e-05	0.00180481	0.282615	-5.84982	0.598261	-3.29731	121.5
56	HORTON_EC1316_5	14.8167	3.65384	0.282818	1.62333e-05	0.000987561	0.282816	1.16816	0.57405	3.9761	130.2
57	HORTON_EC1316_79	21.1785	3.63241	0.282758	2.51912e-05	0.00143019	0.282755	-0.944388	0.890825	1.97396	137.2
58	HORTON_EC1617_95	27.8131	3.61098	0.283086	1.89524e-05	0.0020649	0.283083	10.6326	0.670204	12.3204	80.9
59	HORTON_EC1617_112	9.54958	3.58956	0.283105	2.15873e-05	0.000740146	0.283104	11.3222	0.763383	13.0875	81.2
60	HORTON_EC1617_25	11.0522	3.56813	0.283163	1.51962e-05	0.000943118	0.283162	13.3763	0.537378	15.1333	81.3
62	HORTON_EC1617_53	7.64099	3.5467	0.283017	1.52726e-05	0.000606208	0.283016	8.21313	0.540078	10.0375	83.6
64	HORTON_EC1617_46	16.2782	3.52528	0.283059	2.217e-05	0.00125251	0.283057	9.70661	0.783989	11.5448	85.9
65	HORTON_EC1617_86	42.4788	3.50385	0.283274	2.68062e-05	0.00332444	0.283268	17.2921	0.947935	19.0844	89.4
139	HORTON EC1308 SPOT 12	13.2776	6.01673	0.282929	2.75917e-05	0.000926301	0.282929	5.10921	0.975714	5.24951	6.5
140	HORTON EC1308 SPOT 6	13.6754	5.81307	0.282879	3.31261e-05	0.000908865	0.282878	3.3082	1.17142	3.45071	6.6
141	HORTON EC1308 SPOT 1	8.7572	6.29732	0.28295	2.15283e-05	0.000666136	0.28295	5.84826	0.761296	5.99622	6.8
142	HORTON EC1308 SPOT 13	11.7198	5.8586	0.28294	3.2964e-05	0.000825061	0.28294	5.48037	1.16569	5.62977	6.9
143	HORTON EC1308 SPOT 4	27.2013	5.92148	0.282826	2.38077e-05	0.00187907	0.282826	1.44599	0.841902	1.59472	7.1
144	HORTON EC1552 SPOT 14	33.6077	4.73762	0.296774	0.000137982	0.00219369	0.296772	494.7	4.8794	495.838	52.1
145	HORTON EC1552 SPOT 10	21.7989	5.26101	0.282841	2.91931e-05	0.00137589	0.28284	1.9858	1.03234	3.11856	53.2
146	HORTON EC1552 SPOT 20	43.3235	6.29794	0.282881	2.93814e-05	0.00273218	0.282878	3.38426	1.039	4.47155	53.3
147	HORTON EC1552 SPOT 15	28.3883	5.0198	0.282811	3.05685e-05	0.0018615	0.28281	0.933492	1.08098	2.05326	53.4
148	HORTON EC1552 SPOT 18	27.8641	5.57111	0.282847	2.06397e-05	0.00172121	0.282845	2.19417	0.729871	3.31903	53.4
149	HORTON EC1624 SPOT 9	11.4135	3.12149	0.283403	3.4057e-05	0.000822051	0.283403	21.8635	1.20434	22.4058	25
150	HORTON EC1624 SPOT 10	15.6466	4.24596	0.282981	2.47908e-05	0.00109475	0.282981	6.94208	0.876668	7.50063	26
151	HORTON EC1624 SPOT 110	25.248	2.50656	0.285227	6.74416e-05	0.0020669	0.285226	86.3443	2.38491	86.9139	27.1
152	HORTON EC1624 SPOT 13	13.8357	3.92392	0.282928	2.77076e-05	0.00110338	0.282928	5.06236	0.979812	5.64427	27.1
153	HORTON EC1624 SPOT 8	25.9101	2.96986	0.283134	3.13154e-05	0.00172106	0.283133	12.3243	1.10739	12.8829	26.5
154	HORTON EC1624 SPOT 2	13.0852	3.83764	0.283333	3.18304e-05	0.000936895	0.283332	19.3671	1.12561	19.9593	27.4
155	HORTON EC1502 SPOT 32	11.1368	5.67	0.283148	2.70967e-05	0.000926843	0.283148	12.8377	0.95821	13.0148	8.2
156	HORTON EC1502 SPOT 23	8.11602	5.24948	0.283129	2.26921e-05	0.000587421	0.283129	12.1608	0.802452	12.3332	7.9
157	HORTON EC1509 SPOT 6	24.2005	4.7182	0.283035	3.65282e-05	0.00155695	0.283035	8.85645	1.29173	8.85857	0.1
158	HORTON EC1509 SPOT 40	9.1762	5.11454	0.283069	4.13102e-05	0.000671337	0.283069	10.033	1.46083	10.0417	0.4
159	HORTON EC1509 SPOT 22	13.4837	5.32862	0.283063	2.86146e-05	0.000994517	0.283063	9.84327	1.01189	9.85404	0.5
160	HORTON EC1509 SPOT 96	7.34498	5.37327	0.283023	3.07775e-05	0.000560024	0.283023	8.42802	1.08837	8.45204	1.1
161	HORTON EC1509 SPOT 86	16.0773	4.33713	0.283006	2.91718e-05	0.00110542	0.283006	7.81422	1.03159	7.85287	1.8
162	HORTON EC1509 SPOT 105	10.0963	5.48354	0.283127	3.30268e-05	0.000804532	0.283127	12.0947	1.16791	12.1641	3.2
163	HORTON EC1509 SPOT 100	18.3626	4.03035	0.283009	2.63628e-05	0.00099298	0.283009	7.92605	0.932255	8.02516	4.6
164	HORTON EC1509 SPOT 92	8.96713	5.02408	0.283063	3.80913e-05	0.000676518	0.283063	9.84784	1.34701	9.97405	5.8
166	HORTON EC1568 SPOT 6	16.1816	6.21733	0.282817	3.26033e-05	0.00124298	0.282812	1.11541	1.15294	4.95199	179.2
167	HORTON EC1568 SPOT 10	18.3103	6.2637	0.282827	3.66371e-05	0.00141809	0.282823	1.49971	1.29558	5.32636	179.7
168	HORTON EC1568 SPOT 5	18.9056	6.27664	0.282795	2.24248e-05	0.00143359	0.28279	0.345948	0.792998	4.17455	179.9
169	HORTON EC1568 SPOT 8	10.267	6.41886	0.282844	3.06933e-05	0.000792942	0.282841	2.08545	1.08539	6.00406	180.5
170	HORTON EC1518 SPOT 13	57.781	3.95571	0.282738	3.61844e-05	0.00383464	0.282726	-1.66004	1.27957	1.71036	171.2
171	HORTON EC1518 SPOT 11	40.8414	4.68895	0.282673	3.34633e-05	0.00274165	0.282664	-3.95517	1.18335	-0.449597	171.8
172	HORTON EC1518 SPOT 6	34.5051	4.46175	0.282707	2.32355e-05	0.00234839	0.282699	-2.75624	0.821668	0.819342	173
173	HORTON EC1518 SPOT 12	36.24	5.26912	0.282777	3.3017e-05	0.00246184	0.282769	-0.282106	1.16756	3.2835	173.1
175	HORTON EC1515 SPOT 10	20.7211	3.70599	0.283007	2.83846e-05	0.00148022	0.283003	7.85441	1.00375	10.8795	142.3
176	HORTON EC1515 SPOT 5	42.8539	3.94475	0.282884	3.87798e-05	0.00292016	0.282876	3.50386	1.37135	6.39612	142.5
177	HORTON EC1515 SPOT 3	37.1776	5.08062	0.282928	3.43446e-05	0.00248894	0.282921	5.05859	1.21451	8.01054	143.4
178	HORTON EC1515 SPOT 7	49.7294	4.35802	0.282904	3.50556e-05	0.00350099	0.282894	4.19617	1.23965	7.05187	143.4
179	HORTON EC1502 SPOT 15	9.0235	4.41656	0.301325	4.82756e-05	0.00076534	0.301325	655.612	1.70715	655.755	6.2
180	HORTON EC1502 SPOT 71	2.98707	6.00051	0.28313	2.30138e-05	0.00022402	0.28313	12.2037	0.813826	12.356	6.9
181	HORTON EC1502 SPOT 77	12.9012	4.9692	0.283145	2.29639e-05	0.000914647	0.283145	12.7381	0.812061	12.8937	7.2
182	HORTON ECGG17 SPOT 36	15.8241	5.18266	0.282932	3.84595e-05	0.00129606	0.28293	5.19706	1.36003	6.68347	69.6
183	HORTON ECGG17 SPOT 84	32.1578	3.71676	0.283216	3.23269e-05	0.00238462	0.283213	15.2499	1.14316	16.7891	74.5
184	HORTON ECGG17 SPOT 43	22.5393	4.83125	0.282915	3.34929e-05	0.00168454	0.282912	4.58189	1.1844	6.1897	76.2
185	HORTON ECGG17 SPOT 9	14.0075	5.70466	0.283069	3.61873e-05	0.00106702	0.283067	10.0384	1.27967	11.6998	77.2
186	HORTON ECGG17 SPOT 61	15.6473	5.19216	0.283089	2.93657e-05	0.00116685	0.283088	10.7615	1.03845	12.4415	78.3
187	HORTON ECGG17 SPOT 60	38.9136	4.35498	0.283013	3.55886e-05	0.00288874	0.283009	8.07245	1.2585	9.69138	79.7
95	HORTON EC1310 SPOT 11	23.1343	5.13961	0.283022	3.6822e-05	0.00172719	0.283022	8.38884	1.30212	8.53628	7
96	HORTON EC1310 SPOT 8	13.9449	5.00219	0.282933	3.21681e-05	0.000991984	0.282933	5.24877	1.13755	5.40387	7.2
97	HORTON EC1310 SPOT 2	9.4764	5.51256	0.283001	2.06425e-05	0.000698094	0.283001	7.64139	0.729972	7.8001	7.3
98	HORTON EC1310 SPOT 19	6.95587	5.57717	0.282938	2.83499e-05	0.000540766	0.282938	5.41814	1.00252	5.57976	7.4
99	HORTON EC1310 SPOT 7	4.58073	2.85203	0.282971	3.37312e-05	0.000473594	0.282971	6.56995	1.19282	6.73848	7.7
18	HORTON EC1509 SPOT 8	11.9014	4.73448	0.267065	5.05547e-05	0.000841284	0.267065	-555.91	1.78774	-555.908	0.1
19	HORTON EC1509 SPOT 21	13.0419	4.98019	0.283087	2.6477e-05	0.000945419	0.283087	10.6842	0.936294	10.6863	0.1
20	HORTON EC1509 SPOT 34	11.6057	6.00085	0.283039	3.39489e-05	0.000851221	0.283039	8.98757	1.20052	8.98973	0.1
	Data were collected over three sessions at the Arizona LaserChron Center between 2014 and 2018

## Sheet: Hf isotopes this study
Lu-Hf isotopes (this study)
Sample	E-Hf (0)	E-Hf (T)	Hf 1 sigma uncertainty	Age (Ma)
EC1561: Trigal Fm (Vilcabamba Basin S 4.18923 W 79.30363)
HORTON_EC1561_95	9.28814	9.58102	0.698009	13.7
HORTON_EC1561_89	9.34351	9.64457	0.704561	14.4
HORTON_EC1561_18	3.96939	4.32223	0.588665	16.4
HORTON_EC1561_7	3.61092	3.97966	0.537719	17.2
HORTON_EC1561_78	6.81753	7.19808	0.838408	17.9
HORTON_EC1561_77	9.34558	10.0407	0.588801	32.4
HORTON_EC1561_101	8.97532	9.68277	0.637807	33.2
HORTON_EC1561_20	6.66194	7.37909	0.516436	33.5
HORTON_EC1561_94	4.05068	4.79868	0.91123	37.5
HORTON_EC1561_59	-2.87663	-2.0622	0.817358	38.6
EC1555: Trigal Fm (Loja Basin S 3.96107 W 79.23883)
HORTON_EC1555_29	-1.99509	-0.91459	0.815683	51
HORTON_EC1555_43	2.2838	3.68532	0.717307	64.3
HORTON_EC1555_5	5.09356	6.48637	0.611251	66.8
HORTON_EC1555_115	4.41903	5.86022	0.723735	67.3
EC1560: Quillollaco Fm (Loja Basin S 3.98298 W 79.17153)
HORTON_EC1560_100	2.19357	4.66008	0.683206	114.8
HORTON_EC1560_83	3.95412	6.40789	0.598547	115.3
HORTON_EC1560_11	3.78271	6.3011	0.712821	116.2
HORTON_EC1560_46	5.81386	8.32967	0.618797	116.7
HORTON_EC1560_68	6.68013	9.25034	0.673516	119
HORTON_EC1560_48	4.69831	7.28242	0.767518	121.4
HORTON_EC1560_104	9.43364	12.0242	0.566809	122
EC1538: Mangan Fm (Cuenca Basin S 2.81671 W 78.90871)
Horton_EC1538_120	3.54311	4.02108	0.723924	23.1
HORTON_EC1538_66	5.14518	5.65313	0.543224	23.9
HORTON_EC1538_43	1.01253	1.67768	0.816903	32.5
HORTON_EC1538_84	4.62479	5.35249	0.667745	34.4
Horton_EC1538_spot79	5	5.3	0.990747	11
Horton_EC1538_spot107	5.9	6.1	0.957789	11.1
Horton_EC1538_spot19	6.4	6.6	0.877855	11.3
Horton_EC1538_spot33	5.1	5.3	1.02007	11.3
Horton_EC1538_spot93	7.1	7.3	0.801072	10.9
Horton_EC1538_spot4	6	6.2	0.812907	10.9
Horton_EC1538_spot104	6.3	6.5	0.768651	11.5
Horton_EC1538_spot101	3.5	3.8	1.06305	11.5
Horton_EC1538_spot112	7.5	7.7	0.933969	11.5
Horton_EC1538_spot73	5.5	5.8	0.970271	11.5
Horton_EC1538_spot96	4.2	4.7	0.901831	25.4
Horton_EC1538_spot55	5.1	5.6	1.08358	25.4
Horton_EC1538_spot45	4.6	5.1	0.710117	25.2
Horton_EC1538_spot34	4.3	4.8	0.683041	24.9
Horton_EC1538_spot82	3.8	4.3	1.27474	25.4
Horton_EC1538_spot110	13.6	14.1	1.58691	25.7
Horton_EC1538_spot42	5.6	6.1	0.906738	26
Horton_EC1538_spot26	5.3	5.9	1.08931	26.1
Horton_EC1538_spot62	3.8	4.3	0.950205	26.4
Horton_EC1538_spot115	4.8	5.3	0.73666	24.4
Horton_EC1538_spot60	3.4	4	1.09559	29.2
Horton_EC1538_spot2	2.2	2.8	0.830854	29.4
Horton_EC1538_spot1	0.6	1.3	0.878535	29.4
Horton_EC1538_spot103	1.2	1.9	0.940279	29.8
Horton_EC1538_spot56	1.4	2.7	0.91536	29.8
Horton_EC1538_spot38	3.5	4.2	0.834853	30
Horton_EC1538_spot8	2.6	3.2	0.892061	30.1
Horton_EC1538_spot72	7	7.7	0.901874	30.1
Horton_EC1538_spot9	4.5	5.1	0.775413	30.2
EC1541: Biblian Fm (Cuenca Basin S 2.81923 W 78.88581)
HORTON_EC1541_87	5.30542	5.68305	0.772911	18.3
HORTON_EC1541_115	4.9313	5.3404	0.674374	19.3
HORTON_EC1541_68	3.84555	4.28701	0.706432	20.5
HORTON_EC1541_71	4.77764	5.23067	0.637799	21.1
HORTON_EC1541_105	4.71167	5.19314	0.648863	22.3
EC1637: Yunguilla (near Cuenca Basin S03.11173 W79.01138)
HORTON_EC1637_55	5.26218	8.3522	0.533882	142.5
HORTON_EC1637_100	13.4935	16.5169	0.608873	143.3
EC1619: Quingeo Fm (Quingeo Basin S3.00460601225495 W78.9458780363202)
HORTON_EC1619_14	-0.523435	0.819785	0.676625	62.6
HORTON_EC1619_105	-0.274947	1.09185	0.538771	63.3
HORTON_EC1619_112	-0.953533	0.427146	0.639166	63.9
HORTON_EC1619_12	0.153645	1.58093	0.556594	66.2
HORTON_EC1619_80	-3.01715	-1.53569	0.952442	69.9
HORTON_EC1619_35	9.43513	11.3213	0.526068	88.2
CU1738: Quingeo Fm (Quingeo Basin S 3.02788 W 78.93835)
HORTON_CU1738_4	-0.214544	1.12048	0.66452	61.6
HORTON_CU1738_16	-6.89036	-5.51801	0.46051	62.4
HORTON_CU1738_24	-1.07627	0.30639	0.673512	63.6
EC1557: San Cayetano Fm (Loja Basin S 3.97241 W 79.22986)
HORTON_EC1557_88	4.85242	5.98392	0.64498	53
HORTON_EC1557_116	4.15953	5.33689	0.609666	53.9
HORTON_EC1557_62	3.71699	4.89536	0.669313	54.5
HORTON_EC1557_80	2.26352	3.55052	0.618671	60.6
HORTON_EC1557_101	1.84868	4.9547	0.562169	146.6
EC1301: Quingeo Fm (Quingeo Basin S3.03913 W78.94451)
HORTON_EC1301_15	-3.91882	-2.4906	0.576258	67.1
HORTON_EC1301_02	-6.45625	-4.78048	0.428362	81.1
HORTON_EC1301_08	-4.76265	-2.93332	0.563642	86.9
HORTON_EC1301_14	-3.74087	-1.81353	0.60543	92.8
HORTON_EC1301_01	-5.72701	-3.29953	0.543368	117.4
HORTON_EC1301_13	-5.84982	-3.29731	0.598261	121.5
EC1316: Letrero Fm (Nabon Basin S3.35729 W79.08065)
HORTON_EC1316_5	1.16816	3.9761	0.57405	130.2
HORTON_EC1316_79	-0.944388	1.97396	0.890825	137.2
EC1617: Quingeo Fm (Quingeo Basin S2.97049501910805 W78.9086949918419)
HORTON_EC1617_95	10.6326	12.3204	0.670204	80.9
HORTON_EC1617_112	11.3222	13.0875	0.763383	81.2
HORTON_EC1617_25	13.3763	15.1333	0.537378	81.3
HORTON_EC1617_53	8.21313	10.0375	0.540078	83.6
HORTON_EC1617_46	9.70661	11.5448	0.783989	85.9
HORTON_EC1617_86	17.2921	19.0844	0.947935	89.4
EC1504: Forearc (Angamarca Basin S 0.95607 W 78.99695)
Horton_EC1504_spot47	-1.9	-1	2.12307	39.3
Horton_EC1504_spot62	4	4.8	0.777233	39.6
Horton_EC1504_spot34	-0.9	0	0.812612	40.1
Horton_EC1504_spot20	1	1.9	0.991026	40.4
Horton_EC1504_spot19	0.9	1.7	0.732042	41.2
Horton_EC1504_spot45	4.3	5.2	1.038	41.8
Horton_EC1504_spot97	2.1	3	1.04609	42.6
Horton_EC1504_spot35	-4.5	-3.6	0.814418	44.4
Horton_EC1504_spot51	7.9	8.9	0.935019	45.1
Horton_EC1504_spot10	5.7	6.6	1.04838	46
Horton_EC1504_spot67	5.3	6.4	1.20434	46.4
Horton_EC1504_spot102	5.2	6.4	0.893505	55.2931
Horton_EC1504_spot8	4.6	5.8	1.34621	56.7869
Horton_EC1504_spot15	0	1.2	0.744907	57.2319
Horton_EC1504_spot56	2.8	4	1.07814	57.5255
Horton_EC1504_spot68	6.1	7.4	0.770024	58.5746
Horton_EC1504_spot61	-4.4	-2.9	0.706471	69.6494
Horton_EC1504_spot33	-1.3	0.3	0.755193	70.4113
Horton_EC1504_spot94	-7.9	-6.4	1.03829	70.5576
Horton_EC1504_spot81	-51.3	-49.7	0.823241	71.0246
Horton_EC1504_spot93	9.7	11.2	0.96926	71.5509
Horton_EC1504_spot49	-4.6	-3	0.641943	71.8077
Horton_EC1504_spot48	10.7	12.2	0.807099	72.2382
Horton_EC1504_spot27	9.5	11.1	0.944319	72.7632
Horton_EC1504_spot4	-3.6	-2	0.705458	72.8744
Horton_EC1504_spot44	0.5	2.1	0.976306	72.8806
Horton_EC1504_spot89	3.3	4.8	0.748734	72.6
Horton_EC1504_spot92	0.7	2.2	0.862445	69
Horton_EC1504_spot113	13.1	14.7	0.944265	74.1404
Horton_EC1504_spot69	10.7	12.3	1.07857	74.1626
Horton_EC1504_spot21	-6.9	-5.3	0.866096	74.1991
Horton_EC1504_spot60	-3.5	-1.9	0.962015	74.4305
Horton_EC1504_spot37	-3.1	-1.5	1.08154	74.4719
Horton_EC1504_spot46	11.9	13.5	1.12076	74.9537
Horton_EC1504_spot98	7.5	9.1	0.758813	75.035
Horton_EC1504_spot28	11.7	13.3	0.919814	75.1364
Horton_EC1504_spot105	-7.6	-6	0.695849	75.2496
Horton_EC1504_spot53	11.9	13.5	1.02674	75.9181
Horton_EC1504_spot3	10.1	11.7	0.853669	76.0488
Horton_EC1504_spot23	10	11.7	0.832525	80.4
Horton_EC1504_spot79	11.2	12.9	0.777926	76.8
Horton_EC1504_spot109	12.4	14	0.757048	76.9924
Horton_EC1504_spot32	8.3	9.9	0.963563	77.3731
Horton_EC1504_spot63	14.3	15.9	0.814	77.8055
Horton_EC1504_spot2	10.9	12.5	0.889069	78.8172
Horton_EC1504_spot36	14.3	15.9	1.18292	79.5383
EC1516: Tena Fm (Subandes/Oriente Basin S 1.41419 W 78.20891)
Horton_EC1516_spot80	6.8	8.4	1.46909	76.3
Horton_EC1516_spot42	13.2	14.9	1.40259	78.8
Horton_EC1516_spot53	-1.9	-0.1	1.13125	81.3
Horton_EC1516_spot77	3.3	5.1	1.41816	82.1
Horton_EC1516_spot16	9.6	11.4	1.70234	83.4
EC1562: Quillollaco Fm (Vilcabamba Basin S 4.29580 W 79.21941)
Horton_EC1562_spot6	3.3	3.5	0.869244	10
Horton_EC1562_spot22	2.7	2.9	0.751134	10
Horton_EC1562_spot108	3.1	3.4	0.773533	10
Horton_EC1562_spot90	2.8	3	0.875955	10
Horton_EC1562_spot8	2.2	2.4	0.749815	10
Horton_EC1562_spot89	2.3	2.5	0.957539	10
Horton_EC1562_spot82	2.6	2.9	0.809811	10
Horton_EC1562_spot17	3.5	3.7	0.91959	10.1
Horton_EC1562_spot63	0	0.2	0.973421	10.1
Horton_EC1562_spot88	3.2	3.4	1.14159	9.9
EC1509: Modern River Sand (Pastaza River S 1.06168 W 78.60687)
HORTON EC1509 SPOT 6	8.85645	8.85857	1.29173	0.1
HORTON EC1509 SPOT 40	10.033	10.0417	1.46083	0.4
HORTON EC1509 SPOT 22	9.84327	9.85404	1.01189	0.5
HORTON EC1509 SPOT 96	8.42802	8.45204	1.08837	1.1
HORTON EC1509 SPOT 86	7.81422	7.85287	1.03159	1.8
HORTON EC1509 SPOT 105	12.0947	12.1641	1.16791	3.2
HORTON EC1509 SPOT 100	7.92605	8.02516	0.932255	4.6
HORTON EC1509 SPOT 92	9.84784	9.97405	1.34701	5.8
HORTON EC1509 SPOT 21	10.6842	10.6863	0.936294	0.1
HORTON EC1509 SPOT 34	8.98757	8.98973	1.20052	0.1
EC1502: Forearc (Angamarca S 0.90818 W 78.82013)
HORTON EC1502 SPOT 15	655.612	655.755	1.70715	6.2
HORTON EC1502 SPOT 71	12.2037	12.356	0.813826	6.9
HORTON EC1502 SPOT 77	12.7381	12.8937	0.812061	7.2
HORTON EC1502 SPOT 32	12.8377	13.0148	0.95821	8.2
HORTON EC1502 SPOT 23	12.1608	12.3332	0.802452	7.9
ECGG17: Tena Fm (Subandes/Oriente Basin S1.06490 W77.79116)
HORTON ECGG17 SPOT 36	5.19706	6.68347	1.36003	69.6
HORTON ECGG17 SPOT 84	15.2499	16.7891	1.14316	74.5
HORTON ECGG17 SPOT 43	4.58189	6.1897	1.1844	76.2
HORTON ECGG17 SPOT 9	10.0384	11.6998	1.27967	77.2
HORTON ECGG17 SPOT 61	10.7615	12.4415	1.03845	78.3
HORTON ECGG17 SPOT 60	8.07245	9.69138	1.2585	79.7
EC1308: IGNEOUS Cojitambo (Cuenca Basin S2.76191 W78.88617)
HORTON EC1308 SPOT 12	5.10921	5.24951	0.975714	6.5
HORTON EC1308 SPOT 6	3.3082	3.45071	1.17142	6.6
HORTON EC1308 SPOT 1	5.84826	5.99622	0.761296	6.8
HORTON EC1308 SPOT 13	5.48037	5.62977	1.16569	6.9
HORTON EC1308 SPOT 4	1.44599	1.59472	0.841902	7.1
EC1552: IGNEOUS San Lucas Pluton (near Loja Basin S 3.76504 W 79.25962)
HORTON EC1552 SPOT 14	494.7	495.838	4.8794	52.1
HORTON EC1552 SPOT 10	1.9858	3.11856	1.03234	53.2
HORTON EC1552 SPOT 20	3.38426	4.47155	1.039	53.3
HORTON EC1552 SPOT 15	0.933492	2.05326	1.08098	53.4
HORTON EC1552 SPOT 18	2.19417	3.31903	0.729871	53.4
EC1568: IGNEOUS Zamora Pluton (S 4.02265 W 78.89470)
HORTON EC1568 SPOT 6	1.11541	4.95199	1.15294	179.2
HORTON EC1568 SPOT 10	1.49971	5.32636	1.29558	179.7
HORTON EC1568 SPOT 5	0.345948	4.17455	0.792998	179.9
HORTON EC1568 SPOT 8	2.08545	6.00406	1.08539	180.5
EC1518: IGNEOUS Abitagua Granite (S 1.44726 W 78.16009)
HORTON EC1518 SPOT 13	-1.66004	1.71036	1.27957	171.2
HORTON EC1518 SPOT 11	-3.95517	-0.449597	1.18335	171.8
HORTON EC1518 SPOT 6	-2.75624	0.819342	0.821668	173
HORTON EC1518 SPOT 12	-0.282106	3.2835	1.16756	173.1
EC1515: IGNEOUS Azafran Granite (S 1.41044 W 78.27457)
HORTON EC1515 SPOT 10	7.85441	10.8795	1.00375	142.3
HORTON EC1515 SPOT 5	3.50386	6.39612	1.37135	142.5
HORTON EC1515 SPOT 3	5.05859	8.01054	1.21451	143.4
HORTON EC1515 SPOT 7	4.19617	7.05187	1.23965	143.4
EC1310: IGNEOUS Llacao volcanics (Cuenca Basin S2.82025 W78.92456)
HORTON EC1310 SPOT 11	8.38884	8.53628	1.30212	7
HORTON EC1310 SPOT 8	5.24877	5.40387	1.13755	7.2
HORTON EC1310 SPOT 2	7.64139	7.8001	0.729972	7.3
HORTON EC1310 SPOT 19	5.41814	5.57976	1.00252	7.4
HORTON EC1310 SPOT 7	6.56995	6.73848	1.19282	7.7
1	Data reduction methodology is from Woodhead et al. (2004)
2	Analytical methods described in detail by Gehrels and Pecha (2014)
3	(176Yb + 176Lu) / 176Hf (%) expresses the proportion of 176 due to 176Yb + 176Lu versus the proportion due to 176Hf, in %.
4	Volts Hf is the sum of voltages of all Hf isotopes.
5	176Hf/177Hf is the measured 176Hf/177Hf, corrected for fractionation and interfences. Shown with uncertainty expressed at 1-sigma.
6	176Lu/177Hf is the intensity of 176Lu, calculated from the measured instensity of 175Lu and 176Lu/175Lu=0.02653 (from Patchett, 1983), compared to the measured intensity of 177Hf.
		Fractionation of Lu isotopes is assumed to be the same as fractionation of Yb isotopes.
7	176Hf/177Hf (T) is the 176Hf/177Hf corrected to the time of crystallization using a decay constant of 1.867e-11 (from Scherer et al., 2001 and Soderland et al., 2004)
8	E-Hf (0) is the present-day epsilon Hf value using 176Hf/177Hf=0.282785 and 176Lu/177Hf=0.0336 (from Bouvier et al., 2008). The uncertainty is expressed at 1-sigma.
9	E-Hf (T) is the epsilon Hf value at the time of crystallization. The uncertainty is expressed at 1-sigma.
10	U-Pb ages are based on 206/238 for ages younger than ~1.0 Ga, and on 206/207 for ages older than ~1.0 Ga. This age cutoff may be slightly different for each sample.
11	Isotope ratios as follows:
		180/177	1.88666	Patchett (1983)
		179/177	0.7325	Patchett & Tatsumoto (1980)
		178/177	1.46718	Patchett (1983)
		176/177	0.28216	Patchett (1983)
		174/177	0.00871	Patchett (1983)
		176/175	0.02653	Patchett (1983)
		176/171	0.901691	Vervoort et al. (2004)
		173/171	1.13236	Vervoort et al. (2004)
		172/171	1.53174	Vervoort et al. (2004)
	samples in red were removed from consideration
Notes for plots:
1	DM array is from Vervoort and Blichert-Toft (1999), using 176Hf/177Hf=0.283225 and 176Lu/177Hf=0.0383
2	CHUR is from Bouvier et al. (2008), using 176Hf/177Hf=0.282785 and 176Lu/177Hf=0.0336.
3	Hf isotope evolution lines assume an average value of 176Lu/177Hf=0.0115 and a range of 176Lu/177Hf=0.0036 to 176Lu/177Hf=0.0193.
		Values are from the average and 2-sigma range of values reported by Vervoort and Patchett (1996) and Vervoort et al. (1999).
4	Uncertainties shown at 2-sigma.
References:
	Bouvier, A., Vervoort, J., and Patchett, J., 2008, The Lu-Hf and Sm-Nd isotopic composiiton of CHUR: Consraints from unequilibrated chondrites and implications for the bulk composition of terrestrial planets: Earth and Planetary Science Letters: v. 273, p. 48-57.
	Gehrels, G. and Pecha, M., 2014, Detrital zircon U-Pb geochronology and Hf isotope geochemistry of Paleozoic and Triassic passive margin strata of western North America: Geosphere, v. 10 (1), p. 49-65.
	Patchett, P.J., 1983, Importance of the Lu-Hf isotopic system in studies of planetary chronology and chemical evolution: Geochimica et Cosmochimica Acta, v. 47, p. 81-91.
	Scherer, E., Munker, C., and Mezger, K., 2001, Calibrating the Lu-Hf clock: Science, v. 293, p. 683–686,
	Söderlund, U., Patchett, P.J., Vervoort, J.D. and Isachsen, C.E., 2004, The 176Lu decay constant determined by Lu-Hf and U-Pb isotope systematics of Precambrian mafic intrusions: Earth and Planetary Science Letters, v. 219, p. 311-324.
	Vervoort, J. D., and Blichert-Toft, J., 1999, Evolution of the depleted mantle: Hf isotope evidence from juvenile rocks through time: Geochimica et Cosmochimica Acta, v. 63, p. 533–556.
	Vervoort, J.D., Patchett, P.J., Soderlund, U., and Baker, M., 2004, Isotopic composition of Yb and the determination of Lu concentrations and Lu/Hf ratios by isotope dilution using MC-ICPMS: Geochemistry Geophysics Geosystems, v. 5, Q11002. (doi:10.1029/2004GC000721)
	Vervoort, J.D., and Patchett, P.J., 1996, Behavior of hafnium and neodymium isotopes in the crust: constraints from Precambrian crustally derived granites: Geochimica et Cosmochimica Acta, v. 60, p. 3717-3723
	Vervoort, J.D., Patchett, P.J., Blichert-Toft, J., and Albarede, F., 1999, Relationships between Lu-Hf and Sm-Nd isotopic systems in the global sedimentary system: Earth and Planetary Science Letters, v. 168, p. 79-99.
	Woodhead, J.D., and Hergt, J.M., 2004, A preliminary appraisal of seven natural zircon reference materials for in situ Hf isotope determination: Geostandards and Geoanalytical Research, v. 29 (2), p. 183-195.

## Sheet: Igneous Weighted Mean Data
Igneous Weighted Mean Ages
	U-Pb weighted average age (Ma)	2 sigma uncertainty	Epsilon Hf(t) weighted average	2 sigma uncertainty (Epsilon Hf units)	Unit	Reference
EC1308	6.7	0.2	4.4	2.5	Cojitambo	this study
EC1552	53.7	0.8	3.3	0.9	San Lucas	this study
EC1568	180.3	3.1	4.9	1	Zamora	this study
EC1518	172.4	2.8	1.2	2.3	Abitagua	this study
EC1310	7.4	0.2	6.9	1.6	Llacao	this study
EC1515	142.8	2.3	8.5	3.4	Azafran	this study
09RC65	182.4	0.6	2.8	0.35	Rosa Florida	Cochrane, 2013
09RC63	125.3	0.9	8.15	0.4	Chingual	Cochrane, 2013
09RC61	169.8	1.1	4.9	0.3	Abitagua	Cochrane, 2013
09RC60	173	1.3	4	0.6	Abitagua	Cochrane, 2013
09RC59	140.7	0.7	8.7	0.4	Azafran	Cochrane, 2013
09RC57	143.5	1.3	9.25	0.5	Azafran	Cochrane, 2013
09RC46	178.1	1.4	6.2	0.2	Zamora	Cochrane, 2013
09RC43	131.6	1.1	5.5	1	Zamora	Cochrane, 2013
09RC22	174	1.2	4.3	1.1	Abitagua	Cochrane, 2013
11RC01	78	1.2	13.7	0.3	Pimampiro	Cochrane, 2013
El Domo	42	not reported	12.2	1	El Domo	Vallejo et al., 2016

## Sheet: U-Pb data
Analysis	U ppm	U/Th	207Pb/ 235U	1 sigma error %	206Pb/ 238U	1 sigma error %	207Pb/235U Age (Ma)	1 sigma error (Ma)	206Pb/238U Age (Ma)	1 sigma error (Ma)	206Pb/207Pb Age (Ma)	1 sigma error (Ma)	Best age	1 sigma error (Ma)		S.E.= 1%
																red= excluded from weighted mean age
Sample EC1515
-Sample 2 Spot 13	1098.14	3.30333	0.138352	2.09832	0.0207228	1.60563	131.575	2.58947	132.222	2.10138	119.915	31.8238	132.222	2.10138
-Sample 2 Spot 4	713.756	2.69755	0.147874	2.34682	0.0215978	1.6089	140.033	3.06978	137.746	2.19269	178.945	39.8238	137.746	2.19269
-Sample 2 Spot 15	670.137	2.97662	0.148832	2.23014	0.0220422	1.52244	140.88	2.93361	140.549	2.11663	146.472	38.2078	140.549	2.11663
-Sample 2 Spot 6	1076.06	1.86578	0.154308	2.34668	0.0222294	1.96416	145.708	3.18531	141.73	2.75343	210.984	29.7622	141.73	2.75343
-Sample 2 Spot 1	695.454	2.9544	0.148745	2.33082	0.022231	1.65228	140.803	3.0645	141.741	2.31639	125.009	38.6875	141.741	2.31639
-Sample 2 Spot 10	373.426	2.09208	0.154314	2.33243	0.02232	1.5038	145.714	3.16609	142.302	2.11649	201.617	41.398	142.302	2.11649
-Sample 2 Spot 11	686.873	2.84965	0.150616	1.8899	0.022347	1.37166	142.456	2.51195	142.472	1.9328	142.163	30.4944	142.472	1.9328
-Sample 2 Spot 5	349.553	1.9934	0.151964	2.57377	0.0223579	1.91801	143.644	3.44748	142.541	2.70394	161.911	40.1459	142.541	2.70394
-Sample 2 Spot 8	548.871	2.70937	0.149801	2.74866	0.022458	1.78635	141.736	3.63617	143.172	2.52935	117.77	49.2509	143.172	2.52935
-Sample 2 Spot 14	582.747	2.59465	0.152159	2.19937	0.0224839	1.53043	143.817	2.94927	143.335	2.16944	151.78	37.0099	143.335	2.16944
-Sample 2 Spot 3	480.217	1.94466	0.151774	1.97808	0.0224942	1.24266	143.477	2.64671	143.4	1.7623	144.735	36.0912	143.4	1.7623
-Sample 2 Spot 7	345.343	4.02656	0.15161	2.64062	0.022498	1.53129	143.333	3.52989	143.424	2.17199	141.815	50.4996	143.424	2.17199
-Sample 2 Spot 12	501.93	2.72523	0.151175	2.97254	0.0226805	2.26771	142.949	3.96369	144.575	3.24204	116.044	45.3315	144.575	3.24204
-Sample 2 Spot 9	410.593	2.25205	0.15506	2.42396	0.0227269	1.28565	146.37	3.3041	144.867	1.84171	170.768	47.9896	144.867	1.84171
-Sample 2 Spot 2	472.38	2.70708	0.254887	9.15391	0.0229355	1.5044	230.538	18.8812	146.182	2.17441	1211.74	178.054	146.182	2.17441
Sample EC1518
-Sample 4 Spot 10	368.265	1.17935	0.176969	2.33282	0.0261523	1.49424	165.449	3.56161	166.422	2.45491	151.56	41.9964	166.422	2.45491
-Sample 4 Spot 3	394.539	0.968163	0.182686	2.12191	0.0263866	1.4475	170.369	3.32808	167.894	2.39889	204.906	36.0026	167.894	2.39889
-Sample 4 Spot 5	203.863	2.08614	0.179052	2.87495	0.0267895	1.6089	167.244	4.43311	170.423	2.70602	122.464	56.121	170.423	2.70602
-Sample 4 Spot 13	170.18	1.27905	0.185098	2.89389	0.0269118	1.15614	172.438	4.58947	171.191	1.95316	189.555	61.7341	171.191	1.95316
-Sample 4 Spot 15	525.871	1.1152	0.182906	2.22147	0.0269624	1.29772	170.558	3.48779	171.509	2.19636	157.399	42.1889	171.509	2.19636
-Sample 4 Spot 11	275.239	1.44957	0.179142	2.55151	0.0270019	1.28786	167.322	3.93605	171.757	2.18278	105.022	52.0697	171.757	2.18278
-Sample 4 Spot 8	785.074	1.00442	0.186531	2.32983	0.0271928	1.58111	173.665	3.71901	172.955	2.69825	183.315	39.8518	172.955	2.69825
-Sample 4 Spot 6	319.708	1.5823	0.188164	2.47008	0.0271989	1.44147	175.061	3.97194	172.993	2.46048	203.084	46.5381	172.993	2.46048
-Sample 4 Spot 12	320.935	2.45856	0.182875	2.27799	0.0272169	1.14654	170.531	3.576	173.106	1.95832	134.979	46.2425	173.106	1.95832
-Sample 4 Spot 1	269.673	1.60592	0.181197	2.53211	0.0274069	1.57253	169.09	3.94406	174.298	2.70417	96.8325	47.0012	174.298	2.70417
-Sample 4 Spot 4	344.023	1.57646	0.183081	2.46236	0.02742	1.76021	170.708	3.86912	174.381	3.02833	120.102	40.6045	174.381	3.02833
-Sample 4 Spot 7	345.294	1.06179	0.184436	2.83189	0.0274956	1.74322	171.871	4.47758	174.855	3.00715	131.007	52.4948	174.855	3.00715
-Sample 4 Spot 2	152.439	1.87958	0.183692	2.7238	0.027501	1.58602	171.233	4.29199	174.889	2.73649	121.032	52.1612	174.889	2.73649
-Sample 4 Spot 14	291.928	1.56983	0.192364	2.6319	0.0276838	1.61004	178.644	4.31138	176.036	2.79589	213.276	48.2509	176.036	2.79589
-Sample 4 Spot 9	329.959	1.90739	0.186598	2.2928	0.0277397	1.3828	173.722	3.66101	176.386	2.406	137.607	42.9479	176.386	2.406
Sample EC1568
-Sample 2 Spot 15	285.392	1.4393	0.189161	2.49575	0.0275777	1.49965	175.913	4.03112	175.37	2.59448	183.2	46.4518	175.37	2.59448
-Sample 2 Spot 14	176.275	2.04131	0.185721	3.31193	0.0277968	2.03671	172.971	5.26737	176.744	3.55087	121.668	61.539	176.744	3.55087
-Sample 2 Spot 12	135.79	2.25186	0.193727	3.09123	0.0281363	1.72838	179.805	5.09391	178.873	3.04911	192.092	59.6115	178.873	3.04911
-Sample 2 Spot 6	142.56	2.06362	0.189042	3.1036	0.0281866	1.14348	175.812	5.01027	179.189	2.02077	130.643	67.8837	179.189	2.02077
-Sample 2 Spot 3	174.336	2.33355	0.191101	2.92472	0.0282573	1.44275	177.568	4.76465	179.632	2.55586	150.176	59.6517	179.632	2.55586
-Sample 2 Spot 10	136.418	2.08673	0.191047	2.81622	0.028269	1.65094	177.522	4.58681	179.706	2.92586	148.531	53.481	179.706	2.92586
-Sample 2 Spot 5	535.145	1.93186	0.192569	2.21216	0.0283037	1.39457	178.819	3.62702	179.923	2.47446	164.219	40.1658	179.923	2.47446
-Sample 2 Spot 8	160.728	1.8953	0.192282	3.20876	0.0284037	1.74866	178.574	5.25449	180.55	3.1134	152.523	63.046	180.55	3.1134
-Sample 2 Spot 13	101.65	2.11857	0.193935	3.49303	0.0284203	1.60615	179.981	5.7612	180.654	2.86129	171.134	72.4421	180.654	2.86129
-Sample 2 Spot 2	114.543	1.88807	0.195404	3.03375	0.0285226	1.39262	181.23	5.03538	181.295	2.48958	180.349	62.8327	181.295	2.48958
-Sample 2 Spot 11	136.912	2.07951	0.193635	2.86442	0.0285949	1.50698	179.726	4.71824	181.748	2.70066	153.207	57.0552	181.748	2.70066
-Sample 2 Spot 1	284.771	1.88417	0.191685	2.24321	0.0286543	0.985489	178.066	3.66376	182.12	1.76966	124.546	47.4556	182.12	1.76966
-Sample 2 Spot 7	241.224	1.50654	0.199274	2.64711	0.0287265	1.67392	184.512	4.46618	182.573	3.01326	209.41	47.5447	182.573	3.01326
-Sample 2 Spot 9	89.8247	1.93504	0.192795	3.49854	0.028841	1.87735	179.012	5.74186	183.291	3.39256	122.855	69.5642	183.291	3.39256
-Sample 2 Spot 4	141.017	2.184	0.19517	3.58419	0.0288484	2.17454	181.031	5.94306	183.337	3.93058	151.055	66.785	183.337	3.93058
Sample EC1310
EC1310-03R <>	79.3098	2.40324	0.0576008	176.131	0.000791508	117.217	56.8644	97.7032	5.10037	5.97613	NA	NA	5.10037	5.97613
EC1310-07R <>	113.818	2.21053	0.0238287	123.333	0.000846224	62.4979	23.9115	29.1542	5.45281	3.40645	2860.27	802.515	5.45281	3.40645
EC1310-14R <>	47.5358	2.36642	0.151475	241.401	0.000854626	113.625	143.214	333.991	5.50692	6.25458	NA	NA	5.50692	6.25458
EC1310-13R <>	128.412	2.30545	1.53839	7114.59	0.000916439	135.152	945.858	#NUM!	5.90504	7.97712	NA	NA	5.90504	7.97712
EC1310-11R <>	75.2743	2.08355	0.146896	302.421	0.000937022	114.843	139.168	414.96	6.0376	6.9305	NA	NA	6.0376	6.9305
EC1310-06R <>	140.128	1.66722	0.0429194	221.646	0.000960567	56.0299	42.6704	92.8758	6.18924	3.46616	3589.21	839.937	6.18924	3.46616
EC1310-12R <>	122.09	2.18547	0.0228435	162.185	0.000967968	89.2645	22.934	36.7946	6.23691	5.56465	2569	502.892	6.23691	5.56465
EC1310-02R <>	144.803	1.08598	0.0565842	194.936	0.000976207	43.9054	55.888	106.389	6.28996	2.76028	3983.67	1143.87	6.28996	2.76028
EC1310-04R <>	67.1455	2.35773	-0.0936723	313.789	0.0010442	142.885	-99.8673	-341.634	6.72782	9.60806	NA	NA	6.72782	9.60806
-EC1310 Spot 4	119.063	2.82878	0.00220761	21.0114	0.00107249	4.052	2.23909	0.469947	6.91	0.279843	NA	NA	6.91	0.279843
-EC1310 Spot 11	103.57	2.44916	0.0079509	9.76288	0.00108553	4.64405	8.04128	0.781961	6.99401	0.324629	334.981	194.949	6.99401	0.324629
-EC1310 Spot 17	158.583	1.16758	0.00226061	52.95	0.00109151	4.02757	2.29279	1.21267	7.03251	0.283085	NA	NA	7.03251	0.283085
-EC1310 Spot 9	43.3282	3.09894	0.00535333	11.176	0.0010933	7.89972	5.42118	0.604258	7.04404	0.556156	NA	NA	7.04404	0.556156
EC1310-15R <>	174.26	1.33905	0.0243658	187.446	0.00109422	51.3227	24.444	45.3023	7.04994	3.61624	2471.42	257.672	7.04994	3.61624
EC1310-20R <>	163.906	2.10636	0.0137283	123.847	0.00109818	45.9768	13.8447	17.0314	7.07544	3.25128	1439.57	108.152	7.07544	3.25128
-EC1310 Spot 13	221.752	1.48061	0.00438996	8.84693	0.00111871	3.73707	4.44773	0.392627	7.20765	0.269204	NA	NA	7.20765	0.269204
-EC1310 Spot 8	188.966	2.5761	0.00402082	14.9915	0.00112519	3.66298	4.07449	0.609603	7.24939	0.265395	NA	NA	7.24939	0.265395
EC1310-01R <>	123.769	2.14874	-0.0891071	301.094	0.00113818	41.2996	-94.7656	-308.201	7.33299	3.02677	NA	NA	7.33299	3.02677
-EC1310 Spot 2	391.68	1.83165	0.00793947	6.68647	0.00113945	3.57144	8.02977	0.534791	7.34115	0.262036	220.7	130.866	7.34115	0.262036
-EC1310 Spot 18	64.6062	2.28403	0.00759592	12.7975	0.00115132	5.9273	7.68362	0.979602	7.41763	0.439412	92.8696	269.367	7.41763	0.439412
-EC1310 Spot 19	190.016	2.23024	0.00782403	7.50727	0.00115315	3.7883	7.91347	0.591777	7.42938	0.281285	158.796	151.79	7.42938	0.281285
-EC1310 Spot 5	191.57	2.61336	0.00223291	20.3441	0.00116316	3.72402	2.26473	0.460225	7.49388	0.278912	NA	NA	7.49388	0.278912
-EC1310 Spot 20	309.726	1.47704	0.00631608	9.99905	0.00118091	3.31739	6.39307	0.637238	7.60815	0.252243	NA	NA	7.60815	0.252243
-EC1310 Spot 14	68.9355	1.9542	0.00615717	11.6714	0.00118616	7.15198	6.23272	0.72522	7.64194	0.546226	NA	NA	7.64194	0.546226
-EC1310 Spot 15	68.5594	3.04034	0.00830461	11.3208	0.00119196	7.65149	8.39754	0.946746	7.67928	0.587229	220.473	193.305	7.67928	0.587229
-EC1310 Spot 16	228.417	1.67631	0.00729251	6.32906	0.00120187	4.11198	7.37783	0.465255	7.74307	0.318202	NA	NA	7.74307	0.318202
-EC1310 Spot 7	178.062	2.9	0.00803056	7.1995	0.00120277	4.49667	8.12152	0.582377	7.74889	0.348233	121.089	132.564	7.74889	0.348233
-EC1310 Spot 12	1031.69	1.93684	0.00632337	4.74863	0.00120597	3.55504	6.40043	0.302976	7.76951	0.276042	NA	NA	7.76951	0.276042
-EC1310 Spot 3	184.728	2.42279	0.00292183	8.84397	0.00121683	4.40715	2.96245	0.261616	7.83944	0.345286	NA	NA	7.83944	0.345286
EC1310-10R <>	79.6406	2.40167	0.0408428	136.752	0.00123039	85.3377	40.6465	54.5396	7.92671	6.76032	3124.94	950.709	7.92671	6.76032
EC1310-16R <>	28.6477	2.76387	-0.436911	326.64	0.00137525	161.105	-583.152	#NUM!	8.85932	14.263	NA	NA	8.85932	14.263
EC1310-19R <>	123.991	2.11294	-0.0492574	178.093	0.00139501	62.7739	-51.2889	-93.9557	8.98653	5.63726	NA	NA	8.98653	5.63726
EC1310-05R <>	76.8507	2.46959	0.0397098	178.706	0.0013997	79.8962	39.5407	69.4116	9.01673	7.199	2872.43	588.376	9.01673	7.199
EC1310-08R <>	97.4292	2.40728	0.0586609	189.253	0.0014462	77.9476	57.8817	106.872	9.31607	7.25641	3439.86	882.753	9.31607	7.25641
EC1310-09R <>	55.9253	2.66066	0.972714	1576.29	0.00180058	63.8536	689.862	#NUM!	11.5969	7.39837	NA	NA	11.5969	7.39837
EC1310-18R <>	65.5419	3.07487	-0.177497	344.139	0.00183752	39.3691	-198.41	-971.094	11.8345	4.65487	NA	NA	11.8345	4.65487
EC1310-17R <>	78.2013	1.97274	-0.126985	177.716	0.00199656	75.8786	-137.891	-268.565	12.8578	9.74662	NA	NA	12.8578	9.74662
Sample EC1308
EC1308-09R <>	444.182	1.84733	0.0137664	57.0348	0.000901272	21.8479	13.8828	7.86433	5.80736	1.26822	1812.24	1039.48	5.80736	1.26822
EC1308-12R <>	499.578	1.77909	0.0157757	139.487	0.000912842	17.3872	15.8933	22	5.88187	1.02223	2033.6	155.257	5.88187	1.02223
EC1308-01R <>	173.854	2.35639	-0.0503254	268.089	0.000934171	43.5937	-52.4302	-145.234	6.01924	2.62278	NA	NA	6.01924	2.62278
EC1308-19R <>	508.176	1.15831	0.00739273	77.1679	0.000950277	13.9472	7.47885	5.75013	6.12297	0.853576	469.037	2019.02	6.12297	0.853576
EC1308-08R <>	275.803	2.0325	0.66563	5305.87	0.000958269	30.0419	518.052	#NUM!	6.17444	1.85403	NA	NA	6.17444	1.85403
EC1308-05R <>	409.929	1.50361	0.0110959	107.298	0.000960079	23.0447	11.2046	11.9567	6.1861	1.42488	1288.4	145.975	6.1861	1.42488
EC1308-17R <>	345.755	2.51125	0.0162548	92.6936	0.000965854	33.8221	16.3721	15.0553	6.22329	2.10383	1986.52	395.47	6.22329	2.10383
EC1308-18R <>	243.33	2.41591	0.0365057	258.445	0.00098627	31.8118	36.4067	92.6808	6.35477	2.02057	3296.98	538.348	6.35477	2.02057
-EC1308 Spot 15	437.607	3.3202	0.00415709	11.2114	0.000999697	6.89379	4.21229	0.471277	6.44124	0.443824	NA	NA	6.44124	0.443824
-EC1308 Spot 14	585.491	1.38791	0.00394557	29.5376	0.0010032	7.45675	3.99838	1.17871	6.46379	0.481747	NA	NA	6.46379	0.481747
-EC1308 Spot 12	494.472	2.27194	0.00547576	8.00888	0.00100515	6.48468	5.54483	0.442868	6.47637	0.419761	NA	NA	6.47637	0.419761
-EC1308 Spot 16	738.103	1.15734	0.00553982	12.2453	0.00100795	6.21393	5.60951	0.685006	6.4944	0.403354	NA	NA	6.4944	0.403354
-EC1308 Spot 5	147.904	4.22555	0.00701617	11.3171	0.00101633	8.69697	7.09922	0.800627	6.54836	0.56922	199.174	168.367	6.54836	0.56922
-EC1308 Spot 2	323.963	3.09796	0.00282236	13.9104	0.00101984	4.4261	2.86174	0.39752	6.57095	0.290689	NA	NA	6.57095	0.290689
-EC1308 Spot 6	554.247	1.20163	0.00726755	6.46068	0.00102067	4.5973	7.35266	0.473317	6.57629	0.302178	270.563	104.12	6.57629	0.302178
EC1308-03R <>	539.384	0.737911	0.0119695	45.5006	0.00102728	16.7284	12.0815	5.46462	6.61885	1.10666	1304.21	862.16	6.61885	1.10666
-EC1308 Spot 7	369.114	1.42952	0.00372398	12.4194	0.00102915	6.16755	3.77424	0.467868	6.63094	0.408756	NA	NA	6.63094	0.408756
-EC1308 Spot 18	319.044	3.84101	0.00344333	22.9874	0.0010451	5.11659	3.49029	0.800948	6.73364	0.344352	NA	NA	6.73364	0.344352
-EC1308 Spot 11	728.874	1.40447	0.00374573	9.74602	0.00105288	5.39921	3.79625	0.369292	6.78376	0.366076	NA	NA	6.78376	0.366076
-EC1308 Spot 1	213.774	3.54181	0.00727326	10.3502	0.00105616	7.0979	7.35842	0.758857	6.80484	0.482746	193.506	175.346	6.80484	0.482746
EC1308-16R <>	432.473	1.59819	0.0112499	53.6084	0.00106317	20.6131	11.3592	6.0556	6.85002	1.41125	1114.52	1055.86	6.85002	1.41125
-EC1308 Spot 19	454.113	1.93129	0.00356655	25.2524	0.00106873	5.12642	3.61497	0.911243	6.8858	0.352807	NA	NA	6.8858	0.352807
-EC1308 Spot 17	1282.8	1.37675	0.00673308	5.55827	0.00107274	4.72625	6.81374	0.377458	6.91161	0.326485	NA	NA	6.91161	0.326485
-EC1308 Spot 13	604.195	1.80124	0.0064911	6.73754	0.00107585	4.79676	6.56966	0.441204	6.93164	0.332316	NA	NA	6.93164	0.332316
-EC1308 Spot 8	376.252	2.41136	0.00742183	6.37387	0.00109132	4.1328	7.50817	0.476797	7.03127	0.29043	164.252	113.497	7.03127	0.29043
EC1308-15R <>	200.436	3.45895	0.0476678	249.295	0.00109415	31.058	47.2829	115.669	7.04946	2.18822	3550.33	722.935	7.04946	2.18822
-EC1308 Spot 10	112.111	3.18173	0.00563128	9.53892	0.00109495	6.38281	5.70187	0.542372	7.05465	0.450039	NA	NA	7.05465	0.450039
-EC1308 Spot 4	237.74	3.04635	0.0086273	19.7302	0.00109872	6.19761	8.72245	1.71359	7.07895	0.438485	490.513	416.445	7.07895	0.438485
EC1308-13R <>	241.39	3.11991	-0.0637658	524.364	0.00111089	20.3585	-66.9032	-379.349	7.15731	1.45631	NA	NA	7.15731	1.45631
EC1308-06R <>	537.495	1.68655	0.0199827	186.83	0.00111294	15.1129	20.09	37.182	7.17048	1.08307	2100.93	14.4668	7.17048	1.08307
EC1308-07R <>	295.33	2.23933	0.0158049	179.328	0.00113119	33.538	15.9225	28.3383	7.28802	2.44287	1648.67	289.496	7.28802	2.44287
EC1308-02R <>	214.308	3.43981	1.13076	5407.68	0.00116818	37.6507	768.117	#NUM!	7.5262	2.83201	NA	NA	7.5262	2.83201
EC1308-10R <>	252.87	2.4217	0.0381443	145.363	0.00118676	21.1468	38.0107	54.2838	7.64583	1.61589	3073.53	770.045	7.64583	1.61589
EC1308-20R <>	215.09	3.01017	-0.0682011	438.375	0.00120421	41.2737	-71.7249	-337.721	7.75814	3.20015	NA	NA	7.75814	3.20015
EC1308-11R <>	211.169	2.39468	0.0315496	157.733	0.00128423	33.4632	31.54	49.0224	8.27337	2.76676	2635.96	465.78	8.27337	2.76676
-EC1308 Spot 9	349.776	2.21746	0.0821856	5.69395	0.00682091	5.28373	80.1977	4.39076	43.8211	2.30754	1369.89	40.8426	43.8211	2.30754
-EC1308 Spot 3	224.253	0.965696	0.141546	5.1063	0.0217677	4.78479	134.42	6.42905	138.818	6.57115	58.4566	42.5175	138.818	6.57115
-EC1308 Spot 20	405.709	4.7124	0.514666	10.8812	0.0494445	8.77288	421.582	37.5588	311.11	26.6453	1082.51	129.239	311.11	26.6453
Sample EC1552
-EC1552 Spot 3	561.592	4.4118	0.0515311	2.91883	0.00803772	2.5472	51.0203	1.4524	51.6074	1.3093	24.5938	34.1965	51.6074	1.3093
-EC1552 Spot 14	1063.11	3.91917	0.0531109	3.06278	0.0081181	2.73921	52.5446	1.56839	52.1213	1.42195	72.9017	32.5542	52.1213	1.42195
-EC1552 Spot 2	1226.29	2.52495	0.0535281	3.16682	0.00813111	2.94133	52.9468	1.63376	52.2046	1.52931	87.7221	27.825	52.2046	1.52931
-EC1552 Spot 8	1327.28	2.55505	0.0521415	2.94026	0.00814861	2.69145	51.6095	1.47953	52.3164	1.40237	19.9684	28.4234	52.3164	1.40237
-EC1552 Spot 6	1471.81	2.83439	0.0543331	3.75599	0.00815055	3.37484	53.7223	1.96536	52.3289	1.75887	117.324	38.8794	52.3289	1.75887
-EC1552 Spot 5	814.491	1.83158	0.0523105	3.40991	0.00825547	2.94231	51.7726	1.72115	52.9997	1.55303	NA	NA	52.9997	1.55303
-EC1552 Spot 10	410.786	3.23373	0.0540578	3.04352	0.00829385	2.62022	53.4572	1.5849	53.2451	1.38939	64.0002	36.8719	53.2451	1.38939
-EC1552 Spot 20	1179.75	5.22782	0.0536542	3.24882	0.00830772	2.82303	53.0683	1.67981	53.3338	1.49942	42.1379	38.4513	53.3338	1.49942
-EC1552 Spot 15	453.034	3.9331	0.0538565	3.92654	0.00831584	3.492	53.2632	2.0375	53.3857	1.85653	48.7746	42.8686	53.3857	1.85653
-EC1552 Spot 18	862.546	3.22457	0.0545809	4.11337	0.00832524	3.87324	53.9609	2.16167	53.4458	2.06153	77.9063	32.903	53.4458	2.06153
-EC1552 Spot 1	489.276	3.88101	0.0546303	3.21698	0.00836042	2.84487	54.0085	1.69205	53.6707	1.52052	70.0317	35.7172	53.6707	1.52052
-EC1552 Spot 11	624.117	2.78469	0.0550378	4.03064	0.00840916	3.77346	54.4008	2.135	53.9823	2.02849	73.906	33.677	53.9823	2.02849
-EC1552 Spot 9	1449.94	1.64305	0.0541987	3.41824	0.00851581	3.08283	53.5929	1.78443	54.664	1.67808	7.00743	35.5338	54.664	1.67808
-EC1552 Spot 7	1075.02	7.32641	0.055219	3.31565	0.00854884	3.00933	54.5752	1.76175	54.8751	1.64437	42.49	33.2756	54.8751	1.64437
-EC1552 Spot 13	682.27	3.31753	0.0538409	4.00117	0.00857767	3.70362	53.2482	2.07565	55.0594	2.03051	NA	NA	55.0594	2.03051
-EC1552 Spot 16	853.297	2.51103	0.0549502	3.58164	0.00859541	3.29587	54.3165	1.8943	55.1728	1.81067	17.727	33.6562	55.1728	1.81067
-EC1552 Spot 12	488.995	2.56828	0.0554199	3.69998	0.00869233	3.33891	54.7684	1.97274	55.7922	1.85481	11.2633	38.3479	55.7922	1.85481
-EC1552 Spot 19	706.17	3.13238	0.107857	11.7897	0.00887308	4.67525	104.003	11.6551	56.9473	2.6507	1386.8	208.389	56.9473	2.6507
-EC1552 Spot 17	1240.08	2.71696	0.0583731	3.91742	0.00893361	3.69005	57.6056	2.19384	57.334	2.10627	69.9575	31.2872	57.334	2.10627
-EC1552 Spot 4	688.658	15.2792	0.0620404	4.15195	0.00925795	3.87503	61.1179	2.46273	59.406	2.29142	129.71	35.058	59.406	2.29142
